# Supplementary material
Source: publisher site journal article supplement (https://www.dovepress.com/get_supplementary_file.php?f=376686.docx)
Supplement: Supplementary file 1 [file get_supplementary_file.php]

Supplementary File 1:UHL Events vs Number of Days Post-LIMOS Intervention

|  | UHL A&E visits post LIMOS intervention | | | | UHL Admissions post LIMOS intervention | | | |
| --- | --- | --- | --- | --- | --- | --- | --- | --- |
|  | LOW Admission Risk (n=75) | MEDIUM Admission Risk (n=75) | HIGH Admission Risk (n=43) | Whole Sample  (n=193) | LOW Admission Risk (n=75) | MEDIUM Admission Risk (n=75) | HIGH Admission Risk (n=43) | Whole Sample  (n=193) |
| <30 days | 16 (13.22%) | 16 (21.62%) | 13 (19.70%) | 45 (17.24%) | 11 (15.28%) | 11 (23.40%) | 4 (12.12%) | 26 (17.11%) |
| 31-60 days | 18 (14.88%) | 5 (6.76%) | 8 (12.12%) | 31 (11.88%) | 10 (13.89%) | 5 (10.64%) | 4 (12.12%) | 19 (12.50%) |
| 61-90 days | 7 (5.79%) | 5 (6.76%) | 8 (12.12%) | 20 (7.66%) | 2 (2.78%) | 3 (6.38%) | 2 (6.06%) | 7 (4.61%) |
| >91 days | 80 (66.12%) | 48 (64.86%) | 37 (56.06%) | 165 (63.22%) | 49 (68.06%) | 28 (59.57%) | 23 (69.70%) | 100 (65.79%) |
| Total | 121 | 74 | 66 | 261 | 72 | 47 | 33 | 152 |

**Notes:** This table includes the whole cohort as some non-surviving patients did have admissions/A&E visits in 12 months post LIMOS

**Abbreviations:** UHL, University Hospital Lewisham; A&E, accident and emergency; LIMOS, Lewisham Integrated Medicines Optimisation Service
